# Supplementary material for: Unexpected oxidative C–C cleavage in the metallation of 2-substituted imidazolium salts to give N-heterocyclic carbene complexes
Source: Royal Society of Chemistry journal article supplement (doi:10.1039/b409672j), 2004-01-01
Supplement: b409672j.doc [file b409672j.doc]

**Supporting Information**

**Unexpected oxidative C-C cleavage in the metallation of 2-substituted imidazolium salts to give N-heterocyclic carbene complexes**

Anthony R. Chianese, Brian M. Zeglis, and Robert H Crabtree*

**Experimental Procedures**

**General Methods.** 1,2,3,4-Tetramethylimidazolium iodide (**1**)1 and pentamethylimidazolium iodide (**4a**)2 were prepared as previously described. All other materials are available from commercial sources, and were used as received. Iodide salts were stored in the dark. Reactions were generally performed using untreated solvents, without exclusion of air, unless otherwise specified. Isolated yields are given for all products. NMR spectra were recorded on Bruker spectrometers operating at 400 or 500 MHz (1H NMR) and 100 or 125 MHz (13C NMR), respectively, and referenced to SiMe4 (** in parts per million). NMR spectra were obtained at room temperature unless otherwise noted. Assignments are based on COSY and HMQC experiments. Elemental analyses were performed by Atlantic Microlabs, Inc.; any residual solvent was confirmed by 1H NMR. Syntheses of organic compounds are not optimized.

**[1,3,4-Trimethylimidazolin-2-ylidene][(1,2,5,6-**)-1,5-cyclooctadiene] chlororhodium (2)**. 1,2,3,4-Tetramethylimidazolium iodide (**1**) (149 mg, 0.59 mmol) was stirred overnight in 20 mL methanol with 1 gram of DOWEX 21K Cl- anion exchange beads. The solution was filtered, and the solvent was removed. Absolute ethanol (20 mL) was added and evaporated to azeotropically remove any remaining water. The residue was dissolved in 20 mL dichloromethane, filtered through Celite, and silver oxide (273 mg, 1.18 mmol) was added. The mixture was stirred in the dark for four hours, and filtered through Celite. [Rh(cod)Cl]2 (145 mg, 0.295 mmol) was added, and the mixture was stirred for one hour. The solution was filtered through Celite, reduced to 2 mL, and purified by flash chromatography on silica gel, eluting with 3% triethylamine in ethyl acetate. The solvent was removed, and the product was recrystallized by layering a dichloromethane solution with pentane. Yield: 53 mg, 25%. 1H NMR (CDCl3): ** 6.53 (q, 1H, 4*J*H-H­ = 1.1 Hz, CHimid), 5.00 (m, 2H, CHcod), 4.00 (s, 3H, NCH3), 3.99 (s, 3H, NCH3), 3.29 (m, 2H, CHcod), 2.34-2.45 (m, 4H, CH2-cod), 2.10 (d, 3H, 4*J*H-H­ = 1.1 Hz, CH3-imid), 1.90-2.00 (m, 4H, CH2-cod). 13C NMR (C6D6): ** 182.2 (d, 1*J*Rh-C = 51.4 Hz, NCRhN), 129.3 (*C*CH3), 118.9 (CHimid), 98.1 (d, 1*J*Rh-C = 7.2 Hz, CHcod), 98.0 (d, 1*J*Rh-C = 7.0 Hz, CHcod), 66.9 (d, 1*J*Rh-C = 14.3 Hz, CHcod), 66.8 (d, 1*J*Rh-C = 14.4 Hz, CHcod), 37.2 (2C, CH2-cod), 34.5 (2C, CH2-cod), 33.5 (NCH3), 29.3 (NCH3), 9.1 (C*C*H3). Anal. calcd. for C14H22N2RhCl (356.71): C, 47.14; H, 6.22; N, 7.85. Found: C, 47.40; H, 6.10; N, 7.74.

**2-Benzyl-4,5-dimethylimidazole.** In a 250 mL round-bottom flask were added 4.0 mL (34.2 mmol) phenylacetaldehyde, 30 mL of aqueous ammonia, and 50 mL ethanol. An addition funnel was attached, and 2.0 mL (23 mmol) 2,3-butanedione was added as a solution in 30 mL ethanol, dropwise, over a period of one hour. The mixture was stirred for an additional two hours, and the volatiles were removed. To the residue was added 20 mL of 2M HCl solution. This solution was washed with 3 x 50 mL diethyl ether. Solid potassium carbonate was then added to the aqueous layer until an oil separated. The oily layer was extracted with 3 x 20 mL diethyl ether, washed with brine (10 mL), and dried over sodium sulfate. The solvent was evaporated, and the crude solid obtained was recrystallized from boiling 9:1 diethyl ether/ethyl acetate at -20°C. Yield: 980 mg, 23%. 1H NMR (CDCl3): ** 8.07 (br s, 1H, NH), 7.25-7.37 (m, 5H, C6H5), 4.04 (s, 2H, CH2), 2.11 (br s, 6H, CH3). 13C NMR (CDCl3): ** 144.4, 138.1, 138.0, 128.8, 128.7, 126.7 (Car), 35.1 (NCH3), 10.8 (C*C*H3). Anal. calcd. for C12H14N2 (186.26): C, 77.38; H, 7.58; N, 15.04. Found: C, 77.16; H, 7.68; N, 15.06.

**2-Benzyl-1,3,4,5-tetramethylimidazolium iodide (4b).** In a 50 mL round-bottom flask were combined 116 mg (0.622 mmol) 2-benzyl-4,5-dimethylimidazole, 1 mL iodomethane, 261 mg (3.11 mmol) sodium bicarbonate, and 20 mL dry acetonitrile. The mixture was refluxed while stirring for 16 h. Volatiles were removed, and the solid residue was extracted with dichloromethane (2 x 5 mL) and filtered through Celite. The solution was then layered with ether to give **4a** as white crystals. Although the compound was pure by NMR, a small amount of dichloromethane could not be removed, which prevented a satisfactory elemental analysis. Yield: 191 mg (93%). 1H NMR (CDCl3): ** 7.26-7.38 (m, 3H, CHar), 7.12-7.14 (m, 2H, CHar), 4.66 (s, 2H, CH2), 3.76 (s, 6H, NCH3), 2.32 (s, 6H, CCH3). 13C NMR (CDCl3): ** 143.6, 132.0, 129.4, 127.9, 127.7, 126.3 (Car), 33.4 (NCH3), 31.0 (CH2), 9.36 (C*C*H3). Anal. calcd. for C14H19N2I (342.22): C, 49.13; H, 5.60; N, 8.19. Found: C, 48.60; H, 5.58; N, 8.02.

**4,5-Dimethyl-2-ethylimidazole.** In a 250 mL round-bottom flask were added 2.5 mL (34.2 mmol) propionaldehyde, 30 mL of aqueous ammonia, and 50 mL methanol. An addition funnel was attached, and 2.0 mL (23 mmol) 2,3-butanedione was added as a solution in 30 mL methanol, dropwise, over a period of one hour. The mixture was stirred for an additional two hours, and the volatiles were removed. To the residue was added 20 mL of saturated potassium carbonate solution, to give a solid white precipitate. The solid was washed with water, dried in air, and recrystallized from boiling 1:1 ether/hexanes at room temperature. Yield: 550 mg, 19%. 1H NMR: 9.56 (br s, 1H, NH), 2.65 (q, 2H, 3*J*H-H = 7.7 Hz, CH2), 2.10 (s, 6H, CCH3), 1.24 (t, 3H, 3*J*H-H = 7.7 Hz, CH2C*H*3­). 13C NMR: ** 147.4, 125.7 (Cimid), 21.8 (CH2), 13.1 (CH2*C*H3), 10.7 (C*C*H3). Anal. calcd. for C7H12N2 (124.19): C, 67.70; H, 9.74; N, 22.56. Found: C, 67.62; H, 9.50; N, 22.62.

**2-Ethyl-1,3,4,5-tetramethylimidazolium iodide (4c)**. In a 50 mL round-bottom flask were combined 350 mg (2.82 mmol) 4,5-dimethyl-2-ethylimidazole, 3 mL iodomethane, 940 mg (11.2 mmol) sodium bicarbonate, and 20 mL dry acetonitrile. The mixture was refluxed while stirring for 24 h, at which time an additional 3 mL iodomethane were added. Refluxing was continued for another 24 h. The volatiles were removed, and the solid residue was extracted with dichloromethane (3 x 5 mL) and filtered through Celite. The solution was then layered with ether to give **4a** as white crystals. Yield: 642 mg (81%). 1H NMR (CDCl3): ** 3.61 (s, 6H, NCH3), 2.99 (q, 2H, 3*J*H-H­­ = 7.7 Hz, CH2), 2.10 (s, 6H, CCH3), 1.13 (t, 3H, 3*J*H-H­­ = 7.7 Hz, CH2C*H*3). 13C NMR (CDCl3): ** 147.8, 125.5 (Cimid), 32.9 (NCH3), 18.1 (CH2), 11.3 (CH2*C*H3), 9.0 (C*C*H3). Anal. calcd. for C, 38.57; H, 6.12; N, 10.00. Found: C, 38.57; H, 6.13; N, 9.99.

**4,5-Dimethyl-2-isopropylimidazole.** In a 250 mL round-bottom flask were combined 50 mL methanol, 3.12 mL (34.2 mmol) isobutyraldehyde, 3.00 mL 2,3-butanedione, and 30 mL aqueous ammonia. The solution separated into two phases at this point. Tetrahydrofuran (100 mL) was added, and the mixture was refluxed for 3 hours. The solvent was evaporated, and 20 mL of saturated potassium carbonate solution was added. This solution was extracted with 3 x 30 mL diethyl ether. The fractions were combined, dried over sodium sulfate, and evaporated. The residue was purified by flash column chromatography over silica gel, using 3:1 ethyl acetate/hexanes with 3% triethylamine as eluent (Rf = approx. 0.15). The white solid obtained was then recrystallized from boiling 1:1 ether/hexanes at -20°C. Yield: 140 mg (3%). 1H NMR (CDCl3): ** 10.75 (br s, 1H, NH), 2.98 (sept, 1H, 3*J*H-H = 7.1 Hz, CH), 2.09 (s, 6H, CCH3), 1.28 (d, 6H, 3*J*H-H = 7.1 Hz, CH(C*H*3)2. 13C NMR (CDCl3): ** 151.2, 125.5 (Cimid), 28.3 (CH), 22.0 (CH*C*H3), 10.6 (C*C*H3). Anal. calcd. for C8H14N2 (138.21): C, 69.52; H, 10.21; N, 20.27. Found: C, 69.59; H, 10.15; N, 20.12.

**2-Isopropyl-1,3,4,5-tetramethylimidazolium iodide (4d).** In a 50 mL round-bottom flask were combined 90 mg (0.65 mmol) 4,5-dimethyl-2-isopropylimidazole, 1 mL iodomethane, 219 mg (2.6 mmol) sodium bicarbonate, and 20 mL dry acetonitrile. The mixture was refluxed while stirring for 20 h. The volatiles were removed, and the solid residue was extracted with dichloromethane (3 x 5 mL) and filtered through Celite. The solution was then layered with ether to give **4a** as white crystals. Yield: 180 mg (94%). 1H NMR (CDCl3): ** 3.82 (s, 6H, NCH3), 3.72 (sept, 1H, 3*J*H-H = 7.3 Hz, CH), 2.28 (s, 6H, CCH3), 1.56 (d, 6H, 3*J*H-H = 7.3 Hz, CH(C*H*3)2). 13C NMR (CDCl3): ** 148.0, 126.3 (Cimid), 33.9 (NCH3), 25.3 (*C*H(CH3)2, 19.4 (CH(*C*H3)2, 9.6 (C*C*H3). Anal. calcd. for C10H19N2I (294.1): C, 40.83; H, 6.51; N, 9.52. Found: C, 41.01; H, 6.55; N, 9.66.

**Bis[1,3,4,5-tetramethylimidazolin-2-ylidine]silver hexafluorophosphate** **(5·PF6)**. In a 50 mL roundbottom flask were combined **4a** (98 mg, 0.38 mmol), and silver oxide (348 mg, 1.50 mmol). Dichloromethane (10 mL) was added, and the mixture was stirred in the dark for two days. The mixture was then filtered through Celite, and stirred with 20 mL of 1.0M aqueous NaOH solution containing KPF6 for 20 minutes. The organic layer was removed, filtered through Celite, dried over Na2SO4, and evaporated. The solid residue was washed with a small amount of cold methanol, and dried *in vacuo*. Recrystallation by vapor diffusion of diethyl ether into a dichloromethane solution gave analytically pure **5·PF6**. Yield: 51 mg, 54%. Compound **5·PF6** can be prepared similarly from **4b**. 1H NMR (CD2Cl2): ** 3.64 (s, 6H, NCH3), 2.10 (s, 6H, CCH3). 13C NMR (DMSO-d6): ** 177.6 (NCAgN), 125.8 (*C*CH3), 35.9 (NCH3), 8.6 (C*C*H3). Anal. calcd. for C14H24N4AgPF6·½CH2Cl2 (543.67): C, 32.03; H, 4.64; N, 10.31. Found: C, 32.38; H, 4.65; N, 10.12.

**2-Benzoyl-4,5-dimethylimidazole**. This compound was prepared analogously to 2-benzoylimidazole.3 4,5-Dimethylimidazole4 (758 mg, 7.89 mmol), triethylamine (2.2 mL, 15.8 mmol) pyridine (3 mL) were combined, and cooled to 0°C. While stirring vigorously, benzoyl chloride (1.83 mL, 15.8 mmol) was added dropwise over 5 minutes. The mixture was stirred for 3 hours, and 4 mL of 2M NaOH solution was added. The solution was refluxed for one hour, and cooled to room temperature. Water (20 mL) was added, and a solid slowly crystallized. The precipitate was collected, washed with a small amount of water, dried in air, and purified by flash chromatography on silica gel, eluting with 25% ethyl acetate in hexanes. Yield: 305 mg (19%). NMR spectroscopy at room temperature showed broad proton and carbon resonances for the imidazole backbone, indicative of rotation of the Cimid-Ccarbonyl­ bond or slow exchange of the acidic NH proton. At low temperature, the resonances were sharp. 1H NMR (CDCl3, -50ºC): ** 12.70 (s, 1H, NH), 8.44 (m, 2H, CHar), 7.61 (m, 1H, CHar), 7.53 (m, 2H, CHar), 2.37 (s, 3H, CCH3), 2.29 (s, 3H, CCH3). 13C NMR (CDCl3, -50ºC) ** 181.8 (CO), 141.9, 138.7, 135.8, 133.1, 130.8, 130.0, 128.5 (Carom), 13.0, 10.2 (CH3). Anal. calcd. for C12H12N2O (200.24): C, 71.98; H, 6.04; N, 13.99. Found: C, 71.90; H, 5.95; N, 13.89.

**2-Benzoyl-1,3,4,5-tetramethylimidazolium iodide (6)**. 2-Benzoyl-4,5-dimethylimidazole (50 mg, 0.25 mmol) was combined with sodium bicarbonate (200 mg, 2.38 mmol) and iodomethane (2 mL) in dry acetonitrile (10 mL). The mixture was refluxed under an argon atmosphere for 16 hours. The solvent was removed, and the solid residue was extracted with dichloromethane (2 x 5 mL) and the solution was filtered through Celite and layered with diethyl ether. Yellow crystals of **6** formed, and NMR analysis indicated the presence of about 4% 1,3,4,5-tetramethylimidazolium iodide,5 a product of hydrolysis of **6**. Yield: 82 mg, 92 %. 1H NMR (CDCl3): ** 8.37 (m, 2H, CHar), 7.78 (m, 1H, CHar), 7.66 (m, 2H, CHar), 3.73 (s, 6H, NCH3), 2.47 (s, 6H, CCH3). 13C NMR (CDCl3): ** 181.4 (CO), 138.3, 136.8, 134.5, 131.6, 130.6, 130.2 (Car), 35.0 (NCH3), 10.3 (C*C*H3).

**Analysis of Oxidative C-C Cleavage Reaction for Production of Silver(0)**. In a 50 mL roundbottom flask were combined **4a** (98 mg, 0.38 mmol), and silver oxide (348 mg, 1.50 mmol). Dichloromethane (10 mL) was added, and the mixture was stirred in the dark for four days. 1H NMR spectroscopy of the crude reaction solution indicated complete conversion of **4a** to **5**. The solution was decanted off, and the residual solid was washed with dichloromethane (3 x 10mL), and dried *in vacuo*. The solid residue was then stirred with 20 mL 1M HNO3 for 1 hour, and the solid collected by filtration, washing with 1M HNO3 solution. The solid was washed with water, and then was stirred with aqueous ammonia overnight. The solid was again collected by filtration, washed with aqueous ammonia followed by water, and dried in an oven at 150oC for 1 hour. Two runs gave 163 and 154 mg of silver metal, for an average of 3.86 moles of silver(0) produced per mole of **4a** consumed.

**References**

(1) Chianese, A. R.; Kovacevic, A.; Zeglis, B. M.; Faller, J. W.; Crabtree, R. H. *Organometallics* **2004**, *23*, 2461-2468.

(2) Kuhn, N.; Henkel, G.; Kreutzberg, J. *Z. Naturforsch., B: Chem. Sci.* **1991**, *46*, 1706-1712.

(3) Bastiaansen, L. A. M.; Godefroi, E. F. *Synthesis* **1978**, 675-676.

(4) D'Sa, A.; Cohen, L. A. *J. Heterocycl. Chem.* **1991**, *28*, 1819-1820.

(5) McGuinness, D. S.; Cavell, K. J.; Skelton, B. W.; White, A. H. *Organometallics* **1999**, *18*, 1596-1605.
